# Supplementary material for: Low-dimensional Mo:BiVO4 photoanodes for enhanced photoelectrochemical activity
Source: Royal Society of Chemistry journal article supplement (doi:10.1039/c7ta11132k), 2018-01-01
Supplement: c7ta11132k1.pdf [file c7ta11132k1.pdf]

## Supporting information (SI)

# Low-dimensional Mo:BiVO<sub>4</sub> photoanodes for enhanced photoelectrochemical activity

Miaoyan Huang,<sup>a,b</sup> Juncao Bian,<sup>a,b,c</sup> Wei Xiong,<sup>a,b</sup> Chao Huang,<sup>a,b</sup> and Ruiqin Zhang<sup>\*a,b</sup>

<sup>a</sup>Department of Physics, City University of Hong Kong, Hong Kong SAR, China

<sup>b</sup>Shenzhen Research Institute, City University of Hong Kong, Shenzhen, China

<sup>c</sup>Department of Electrical Engineering, The Hong Kong Polytechnic University, Hong Kong SAR, China

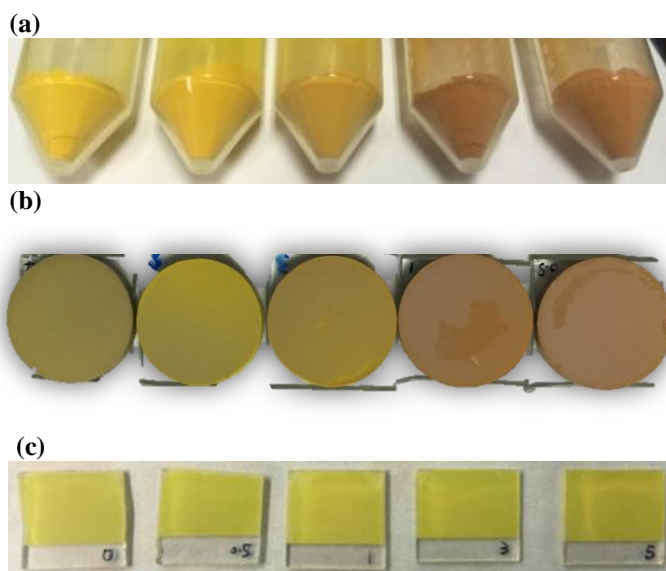

**Figure S1.** Digital photo of as prepared BiVO<sub>4</sub>. (a) Powder, (b) targets and (c) films

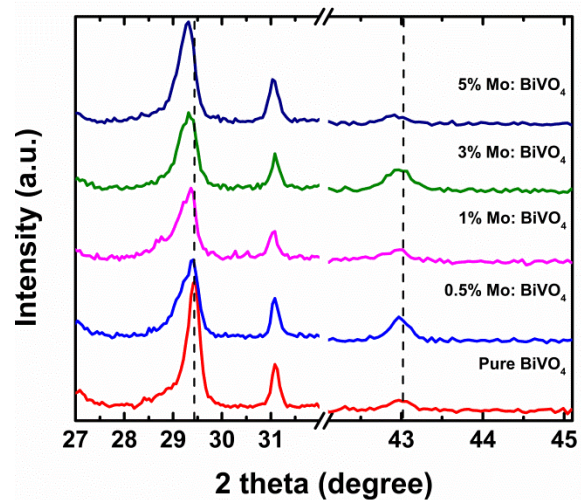

**Figure S2.** Magnifications of XRD patterns.

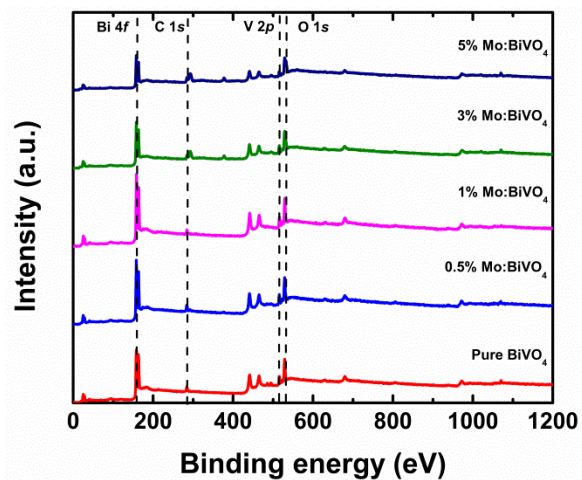

**Figure S3.** XPS survey scan for BiVO<sub>4</sub> films.

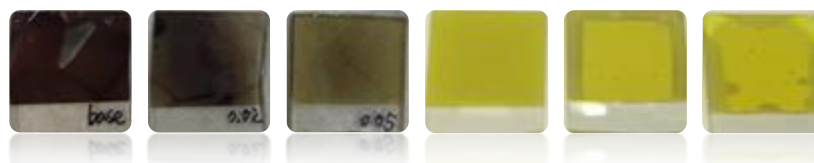

**Figure S4.** Films prepared under base vacuum, 0.02mbar, 0.05mbar, 0.2mbar, 0.5mbar, 1mbar. (From left to right)

**Table S1.** Surface and bulk composition of pure BiVO<sub>4</sub> and Mo:BiVO<sub>4</sub> films

| Photoanode                   | V at%, Mo at% and Bi at% (XPS) | V at%, Mo at% and Bi at% (EDS) |
|------------------------------|--------------------------------|--------------------------------|
| Pure BiVO <sub>4</sub> film  | 33.82%, N/A and 66.18%         | 43.04%, N/A and 56.96%         |
| 1% Mo:BiVO <sub>4</sub> film | 33.62%, 1% and 65.38%          | 43.50%, 0.73% and 55.77%       |
| 5% Mo:BiVO <sub>4</sub> film | 31.71%, 3.17% and 65.12%       | 41.15%, 2.51% and 56.34%       |

**Table S2.** Summary of Mo:BiVO<sub>4</sub> films flat band potential and carrier density

| Photoanode                | Flat band potential (V) vs. RHE | Carrier density/cm <sup>3</sup> |
|---------------------------|---------------------------------|---------------------------------|
| Pure BiVO <sub>4</sub>    | 0.011                           | 6.42 x 10 <sup>18</sup>         |
| 0.5% Mo:BiVO <sub>4</sub> | 0.023                           | 1.24 x 10 <sup>19</sup>         |
| 1% Mo:BiVO <sub>4</sub>   | 0.025                           | 2.06 x 10 <sup>19</sup>         |
| 3% Mo:BiVO <sub>4</sub>   | 0.041                           | 3.42 x 10 <sup>19</sup>         |
| 5% Mo:BiVO <sub>4</sub>   | 0.042                           | 5.11 x 10 <sup>19</sup>         |

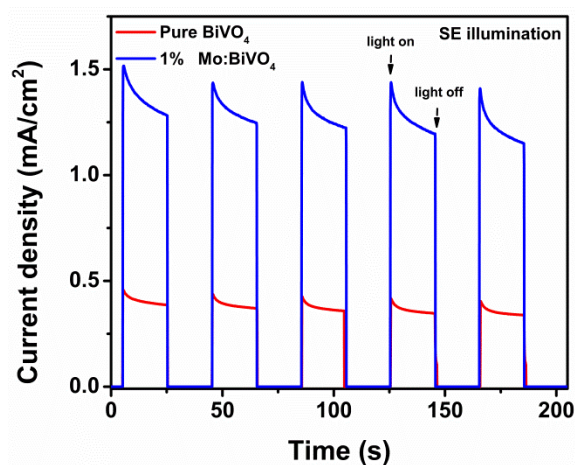**Figure S5.** Chopped transient photocurrent density of pure BiVO<sub>4</sub> and 1% Mo:BiVO<sub>4</sub> films for water oxidation under SE illumination

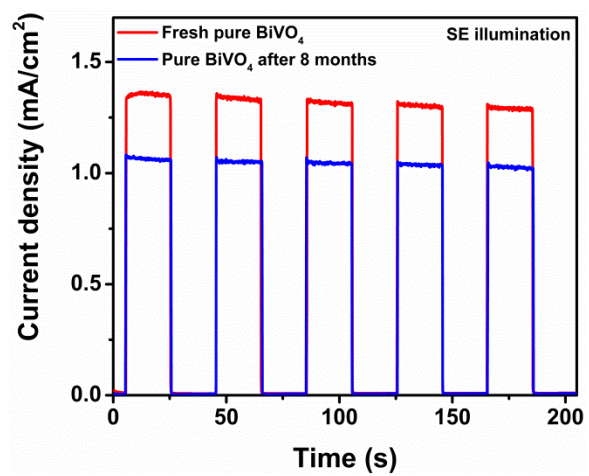

**Figure S6.** chopped transient photocurrent density of fresh photoanode and photoanode that has been kept in the dark for 8 months respectively.

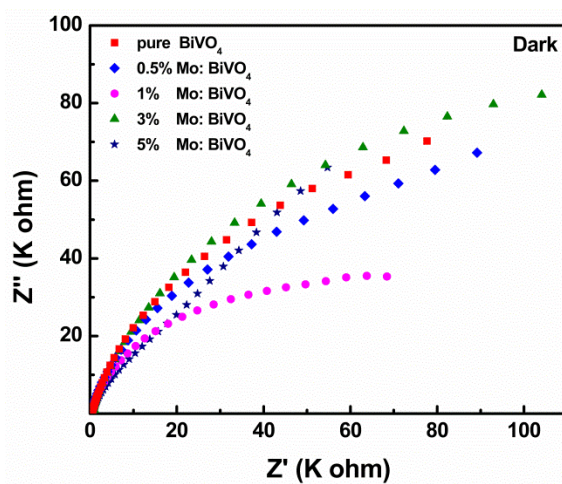

**Figure S7.** Nyquist plots of BiVO<sub>4</sub> films in dark conditions.

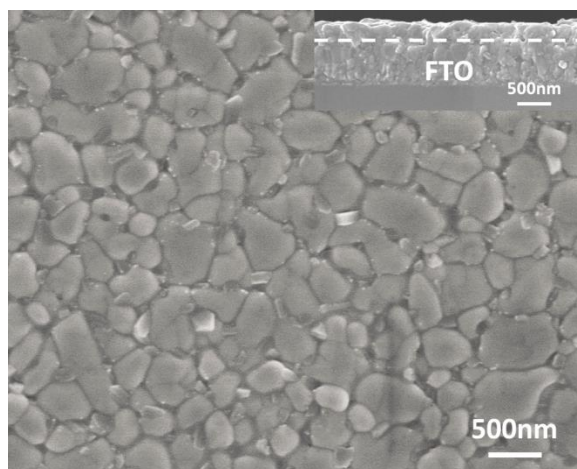

**Figure S8.** Plane-view and cross-sectional (inset) field emission scanning electron microscopy images of pure  $\text{BiVO}_4$  film prepared under base vacuum.
